# Supplementary material for: Preparation of highly stable and ultrasmooth chemically grafted thin films of chitosan
Source: Royal Society of Chemistry journal article supplement (doi:10.1039/d3sm00003f), 2023-01-01
Supplement: d3sm00003f1.pdf [file d3sm00003f1.pdf]

## Supporting Information

### Preparation of highly stable and ultrasmooth chemically grafted thin films of chitosan

Cyrielle GARREAU<sup>a</sup>, Leonardo CHIAPPISI<sup>b</sup>, Samantha MICCIULLA<sup>b</sup>, Isabelle MORFIN<sup>c</sup>,  
Stéphane TROMBOTTO<sup>a</sup>, Thierry DELAIR<sup>a</sup>, Guillaume SUDRE<sup>a</sup>

<sup>a</sup> Univ Lyon, Université Claude Bernard Lyon 1 CNRS, IMP UMR 5223, F-69622, Villeurbanne, France

<sup>b</sup> Institut Laue-Langevin, 71 Avenue des Martyrs, Grenoble F-38000, Cedex 9, France

<sup>c</sup> LIPhy, Université Grenoble Alpes CNRS, UMR 5588, 140 Avenue de la Physique, Saint Martin d'Hères F-38402, France

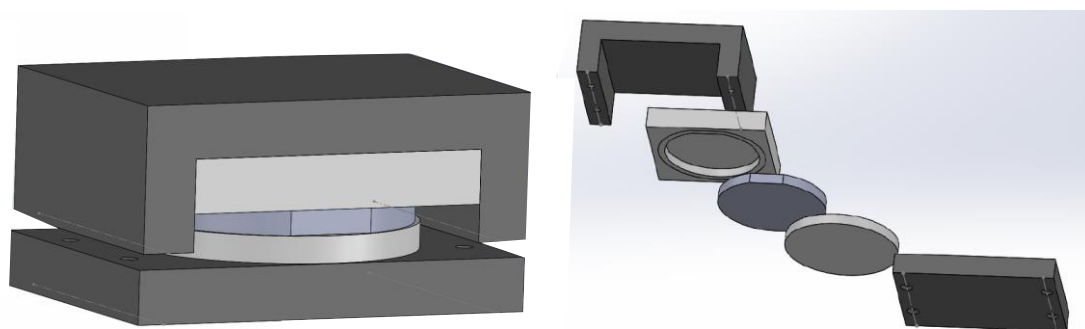

Figure S1: Customized cell for neutron reflectivity analysis: silicon blocks clamped against a Teflon trough filled with the liquid solution, held by a stainless steel device.

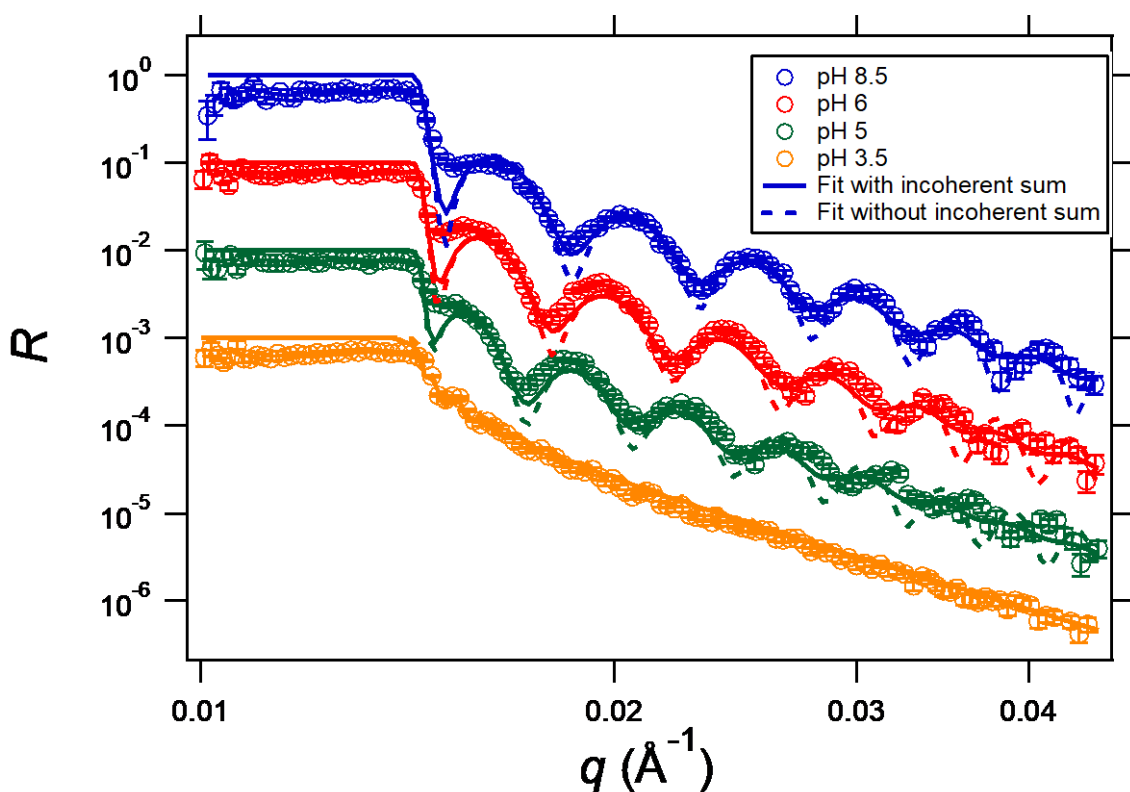

Figure S2: Neutron reflectivity curves and corresponding fits (with and without including an incoherent sum over areas with slightly different thicknesses) for chitosan films of similar thickness (45 nm) immersed in a  $\text{D}_2\text{O}$  solution (with 10 mM NaCl) at different pH: 8.5, 6, 5 and 3.5.

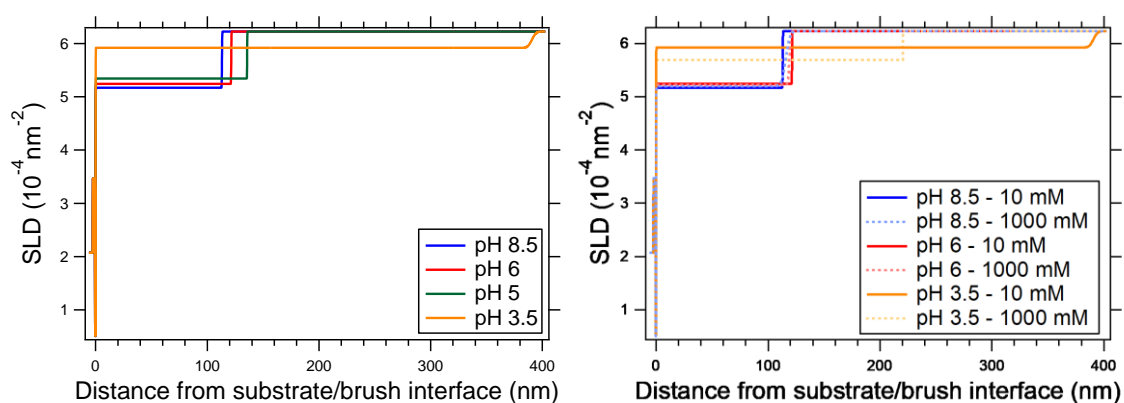

Figure S3: Profiles of scattering length density for chitosan films of similar thickness (45 nm) immersed in  $\text{D}_2\text{O}$  solutions at different pH (8.5, 6, 5 and 3.5) and different ionic strengths
